# Supplementary material for: Heterogeneous MYCN amplification in neuroblastoma: a SIOP Europe Neuroblastoma Study
Source: PubMed Central journal article supplement (PMC5988829; doi:10.1038/s41416-018-0098-6), 2018-05-14
Supplement: 41416_2018_98_MOESM1_ESM.pdf [file 41416_2018_98_MOESM1_ESM.pdf]

Supplementary Figure 1

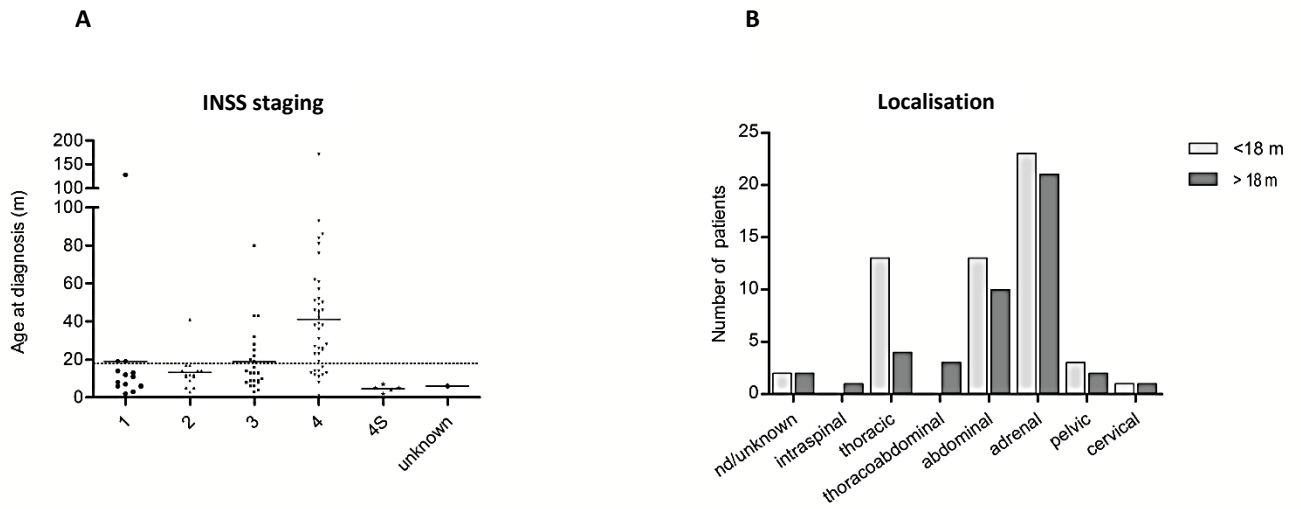

Supplementary Figure 2

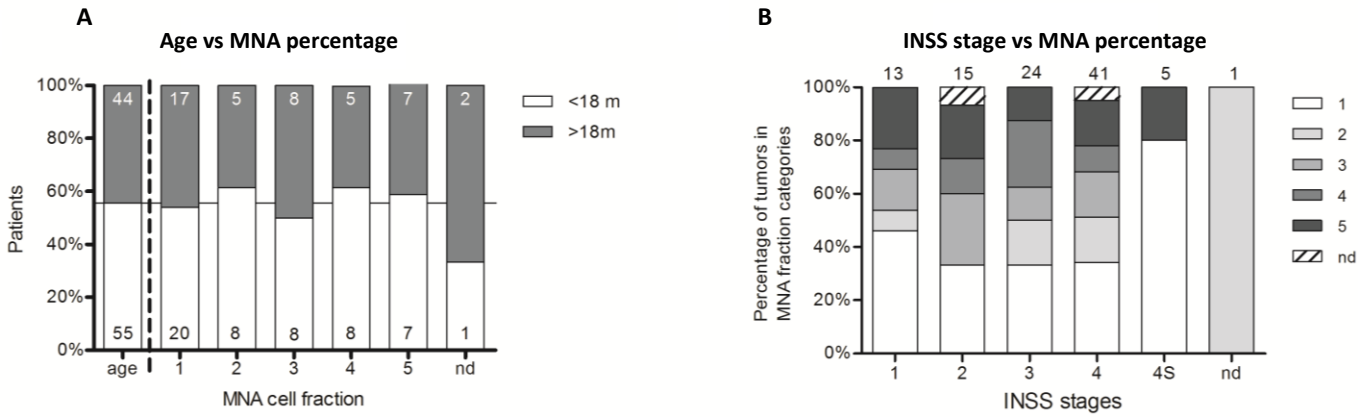

C

| INSS stages                    | 1          | 2          | 3          | 4           | 4S       | nd       |
|--------------------------------|------------|------------|------------|-------------|----------|----------|
| <b>MNA fraction categories</b> |            |            |            |             |          |          |
| 1                              | 6 (46.15%) | 5 (33.3%)  | 8 (33.33%) | 14 (34.15%) | 4 (80%)  | 0 (0)    |
| 2                              | 1 (7.69%)  | 0 (%)      | 5 (20.83%) | 7 (17.07%)  | 0 (0)    | 1 (100%) |
| 3                              | 2 (15.38%) | 4 (26.67%) | 2 (8.33%)  | 7 (17.07%)  | 0 (0)    | 0 (0)    |
| 4                              | 1 (7.69%)  | 2 (13.33%) | 6 (25%)    | 4 (9.76%)   | 0 (0)    | 0 (0)    |
| 5                              | 3 (23.08%) | 3 (20%)    | 3 (12.5%)  | 7 (17.07%)  | 1 (20%)  | 0 (0)    |
| nd                             | 0 (0)      | 1 (6.67%)  | 0 (0)      | 2 (4.88%)   | 0 (0)    | 0 (0)    |
| Total                          | 13 (100%)  | 15 (100%)  | 24 (100%)  | 41 (100%)   | 5 (100%) | 1 (100%) |

Abbreviation: INSS = International Neuroblastoma Staging System; MNA = MYCN amplification; nd = no data
